# Supplementary material for: Bridging Reinforcement Learning and Iterative Learning Control: Autonomous Motion Learning for Unknown, Nonlinear Dynamics
Source: Frontiers journal article supplement (doi:10.3389/frobt.2022.793512), 2022-07-12
Supplement: Data_Sheet_1.pdf [file Data_Sheet_1.pdf]

## A Appendices

### A.1 Comparison of Feedforward and Feedback Control for Reference Tracking

We consider a discrete-time, linear system of first order with sampling period  $T = 0.02$  seconds, output  $y \in \mathbb{R}$ , and input  $u \in \mathbb{R}$ . The system is affected by an input delay of one sample leading to state-space dynamics

$$\forall n \in \mathbb{N}, \quad \mathbf{x}(n+1) = \begin{bmatrix} 0.5 & 1 \\ 0 & 0 \end{bmatrix} \mathbf{x}(n) + \begin{bmatrix} 0 \\ 1 \end{bmatrix} u(n), \quad (1)$$

where  $\mathbf{x} \in \mathbb{R}^2$  is the state vector. The system's output is affected by measurement noise, i.e.,

$$\forall n \in \mathbb{N}_{\geq 0}, \quad y(n) = [1 \quad 0] \mathbf{x}(n) + w(n), \quad (2)$$

where  $w(n) \in \mathbb{R}$  is measurement noise that is drawn from a normal distribution with zero-mean and variance  $10^{-4}$ , i.e.,

$$\forall n \in \mathbb{N}_{\geq 0}, \quad w(n) \sim \mathcal{N}(0, 10^{-4}). \quad (3)$$

The task consists of having the output  $y$  follow the reference  $r \in \mathbb{R}$  over a finite horizon of  $N = 100$  samples with

$$\forall n \in [1, N], \quad r(n) = \sin(2\pi Tn). \quad (4)$$

The feedforward control strategy consists of applying an input trajectory

$$\mathbf{u}_{\text{FF}} := [u_{\text{FF}}(0) \quad u_{\text{FF}}(1) \quad \dots \quad u_{\text{FF}}(N-1)]^T. \quad (5)$$

The input values are determined by optimization such that the squared tracking error is minimized, i.e.,

$$\mathbf{u}_{\text{FF}} = \underset{\mathbf{u}}{\operatorname{argmin}} \sum_{n=1}^N [r(n) - y(n)]^2. \quad (6)$$

The feedback control strategy consists of a generic, non-linear function to ensure that performance is not limited by the structure of the feedback law. In particular, the input values  $u_{\text{FB}}$  are computed as the sum of ten polynomials of tenth order, to which the current and nine previous error samples serve as inputs, i.e.,  $\forall n \in [1, N]$ ,

$$u_{\text{FB}}(n) = \sum_{i=1}^{10} \sum_{j=1}^{10} k_{ij} [r(n) - y(n)]^j. \quad (7)$$

The set of feedback parameters  $\mathcal{K} = \{k_{ij} \mid i, j \in [1, 10]\}$  is determined via optimization such that the squared tracking error is minimized, i.e.,

$$\mathcal{K} = \underset{\tilde{\mathcal{K}}}{\operatorname{argmin}} \sum_{n=1}^N [r(n) - y(n)]^2. \quad (8)$$

## A.2 Reference Trajectories

The first reference  $\mathbf{r}_1 \in \mathbb{R}^{25}$  is given by,  $\forall n \in [1, 25]$ ,

$$[\mathbf{r}_1]_n = 75 \sin(2\pi Tn). \quad (9)$$

The second reference  $\mathbf{r}_2 \in \mathbb{R}^{50}$  is given by,  $\forall n \in [1, 50]$ ,

$$[\mathbf{r}_2]_n = \begin{cases} 57 \sin(1.38\pi Tn) & \forall n \leq 17 \\ 57 & \forall 17 < n \leq 31 \\ 57 \sin(1.38\pi T(n-13)) & \forall 31 < n \end{cases} \quad [^\circ]. \quad (10)$$

The third reference  $\mathbf{r}_3 \in \mathbb{R}^{71}$  is given by,  $\forall n \in [1, 71]$ ,

$$[\mathbf{r}_3]_n = \begin{cases} -20 \sin(1.5\pi Tn) & \forall n \leq 16 \\ -20 & \forall 16 < n \leq 31 \\ -20 \sin(1.5\pi T(n-11)) & \forall 31 < n \leq 43 \\ 46 \sin(1.8\pi T(n+13)) & \forall 43 < n \end{cases} \quad [^\circ]. \quad (11)$$

## A.3 Feedback Control of the TWIPR

Consider the dynamics of the TWIPR moving along a straight line. The robot has two degrees of freedom, namely, the pitch angle  $\Theta \in \mathbb{R}$  and the position  $s \in \mathbb{R}$ . The state vector follows with

$$\mathbf{x} = [\Theta \quad \dot{\Theta} \quad s \quad \dot{s}]^T. \quad (12)$$

The motor torque serves as input variable and is denoted by  $u \in \mathbb{R}$ . To stabilize the TWIPR in its upright equilibrium, the nonlinear dynamics are approximated by a linear, discrete-time model with state vector  $\mathbf{x} \in \mathbb{R}^4$  of the form

$$\forall n \in \mathbb{N}, \quad \mathbf{x}(n+1) = \mathbf{A}\mathbf{x}(n) + \mathbf{B}u(n) \quad (13)$$

using a sampling period of  $T = 0.02$  seconds. The stabilizing control input  $u_C \in \mathbb{R}$  is computed by linear state feedback of the form

$$\forall n \in \mathbb{N}, \quad u_C(n) = -\mathbf{K}\mathbf{x}(n), \quad (14)$$

where the feedback matrix  $\mathbf{K}$  is designed by LQR [1].

To track the desired reference maneuvers, the feedback input  $u_C$  is superposed by a learned feedforward input  $u_L$  leading to the overall input

$$\forall n \in \mathbb{N}, \quad u(n) = u_C(n) + u_L(n). \quad (15)$$

## A.4 Policy Gradient Implementation

In this section, we briefly outline the implementation details of the finite-difference policy gradient method that was used as a baseline comparison in Section 4.2. For a detailed discussion of the method and its implementation,

see [2]. The finite-difference gradient estimation was chosen because this method is expected to be highly efficient due to the deterministic nature of the simulations, see [2].

In order to apply the policy gradient scheme to the learning task of Section 4.2, the policy is defined as the input trajectory  $\mathbf{u}_j$ , and the reward of a trial reward is defined as

$$\forall j \in \mathbb{N}_{\geq 0}, \quad R_t := \frac{1}{2}(\mathbf{r} - \mathbf{y}_j)^\top (\mathbf{r} - \mathbf{y}_j). \quad (16)$$

On each iteration, the policy is updated by

$$\forall j \in \mathbb{N}_{\geq 0}, \quad \mathbf{u}_{j+1} = \mathbf{u}_j + \alpha \nabla R_j, \quad (17)$$

where  $\nabla R_j$  is an estimate of the reward's gradient with respect to the input trajectory, and  $\alpha \in \mathbb{R}$  is a step-size. To estimate the gradient,  $W \in \mathbb{N}$  roll-out trials with the perturbed policies  $\mathbf{u}_j + \Delta_w$  are performed, and the gradient is determined by least-squares estimation, as detailed in [2]. In the simulations, the step-size was chosen as  $\alpha = 50$ , one roll-out per trial, i.e.,  $W = 1$ , was used, and the policy permutations were drawn according to

$$\Delta_w \sim \mathcal{N}(\mathbf{0}, 0.001\mathbf{I}). \quad (18)$$

In contrast to the method proposed in this paper, the parameters of the policy gradient scheme had to be tuned manually and were chosen to yield a satisfying trade-off between a fast speed of learning and robust convergence for all three reference trajectories.

## References

- [1] Frank L Lewis, Draguna Vrabie, and Vassilis L Syrmos. *Optimal control*. John Wiley & Sons, 2012.
- [2] Jan Peters and Stefan Schaal. Policy gradient methods for robotics. In *2006 IEEE/RSJ International Conference on Intelligent Robots and Systems*. IEEE, October 2006.
